# Supplementary material for: Sustained small molecule delivery from injectable hyaluronic acid hydrogels through host–guest mediated retention
Source: Royal Society of Chemistry journal article supplement (doi:10.1039/c5tb00981b), 2015-01-01
Supplement: c5tb00981b1.pdf [file c5tb00981b1.pdf]

**Supplementary Information for:**

**Sustained Small Molecule Delivery from Injectable Hyaluronic Acid  
Hydrogels through Host-Guest Mediated Retention**

*Joshua E. Mealy<sup>a</sup>, Christopher B. Rodell<sup>b</sup>, Jason A. Burdick<sup>c,\*</sup>*

210 S 33<sup>rd</sup> St, 240 Skirkanich Hall, Department of Bioengineering, University of  
Pennsylvania, Philadelphia, PA, 19104

<sup>a</sup> mealy@seas.upenn.edu

<sup>b</sup> crodell@seas.upenn.edu

<sup>c,\*</sup> Corresponding author: burdick2@seas.upenn.edu, (215) 898-8537

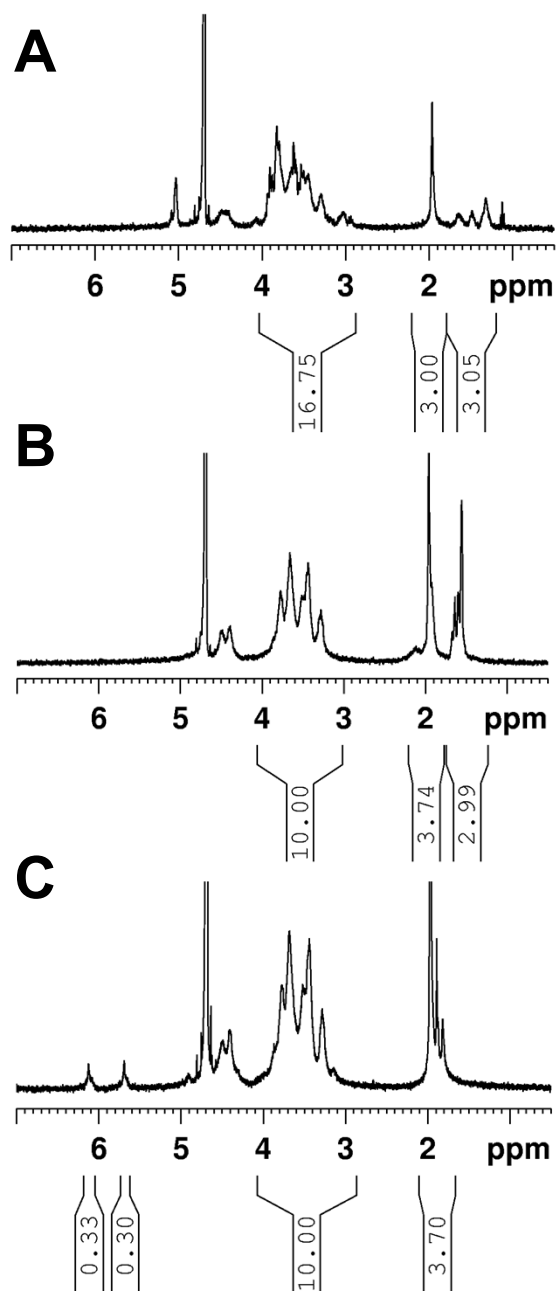

**Figure S1.**  $^1\text{H}$ -NMR for CD-HA (A), Ad-HA (B), and MeHA (C).

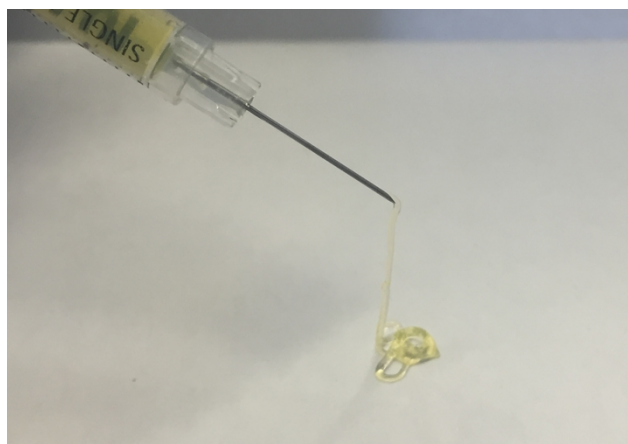

**Figure S2.** Injection of a 1:2 (7.8 wt%) hydrogel loaded with 100  $\mu$ M 3W peptide through a 27G needle.

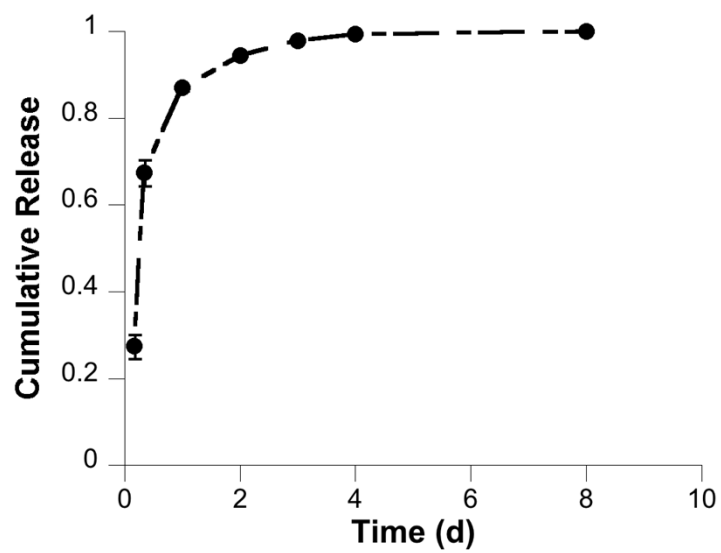

**Figure S3.** Cumulative 3W release from covalently crosslinked hydrogel containing no cyclodextrin (MeHA).

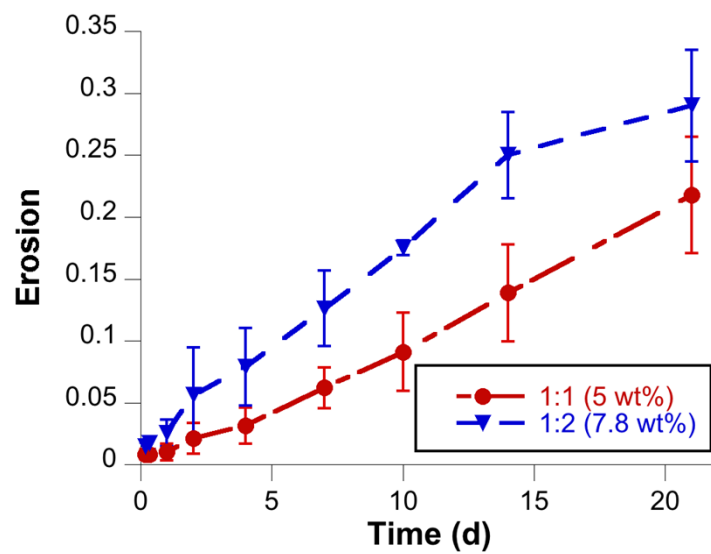

**Figure S4.** Hydrogel erosion for matched and mismatched CD-HA/Ad-HA systems.
